# Supplementary material for: Subunits controlled synthesis of α-Fe2O3 multi-shelled core–shell microspheres and their effects on lithium/sodium ion battery performances
Source: Royal Society of Chemistry journal article supplement (doi:10.1039/c5ta01334h), 2015-01-01
Supplement: c5ta01334h1.pdf [file c5ta01334h1.pdf]

Electronic Supplementary Information

## Subunits controlled synthesis of $\alpha$ - $\text{Fe}_2\text{O}_3$ multi-shelled core-shell microspheres and effects on lithium/sodium ion batteries performances

Zhen-guo Wu,<sup>a</sup> Yan-jun Zhong,<sup>a</sup> Jie Liu,<sup>b</sup> Jiao-hong Wu,<sup>c</sup> Xiao-dong Guo,<sup>a</sup> Ben-he Zhong,<sup>a</sup> and Zhi-ye Zhang<sup>\*a</sup>

<sup>a</sup> School of Chemical Engineering, Sichuan University, Chengdu, 610065 (PR China); E-mail: nic1201@163.com

<sup>b</sup> College of Chemistry and Chemical Engineering, Xiamen University, Xiamen, 361005 (PR China)

<sup>c</sup> School of Energy Research, Xiamen University, Xiamen, 361005 (PR China)

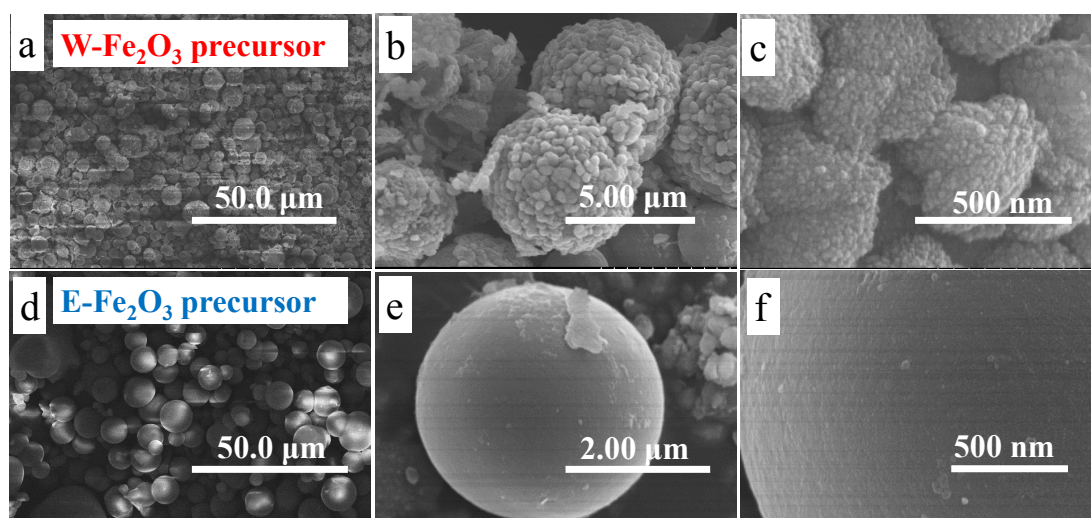

FigureS1. SEM images of W-Fe<sub>2</sub>O<sub>3</sub> precursor (a, b, c) and E-Fe<sub>2</sub>O<sub>3</sub> precursor (d, e, f).

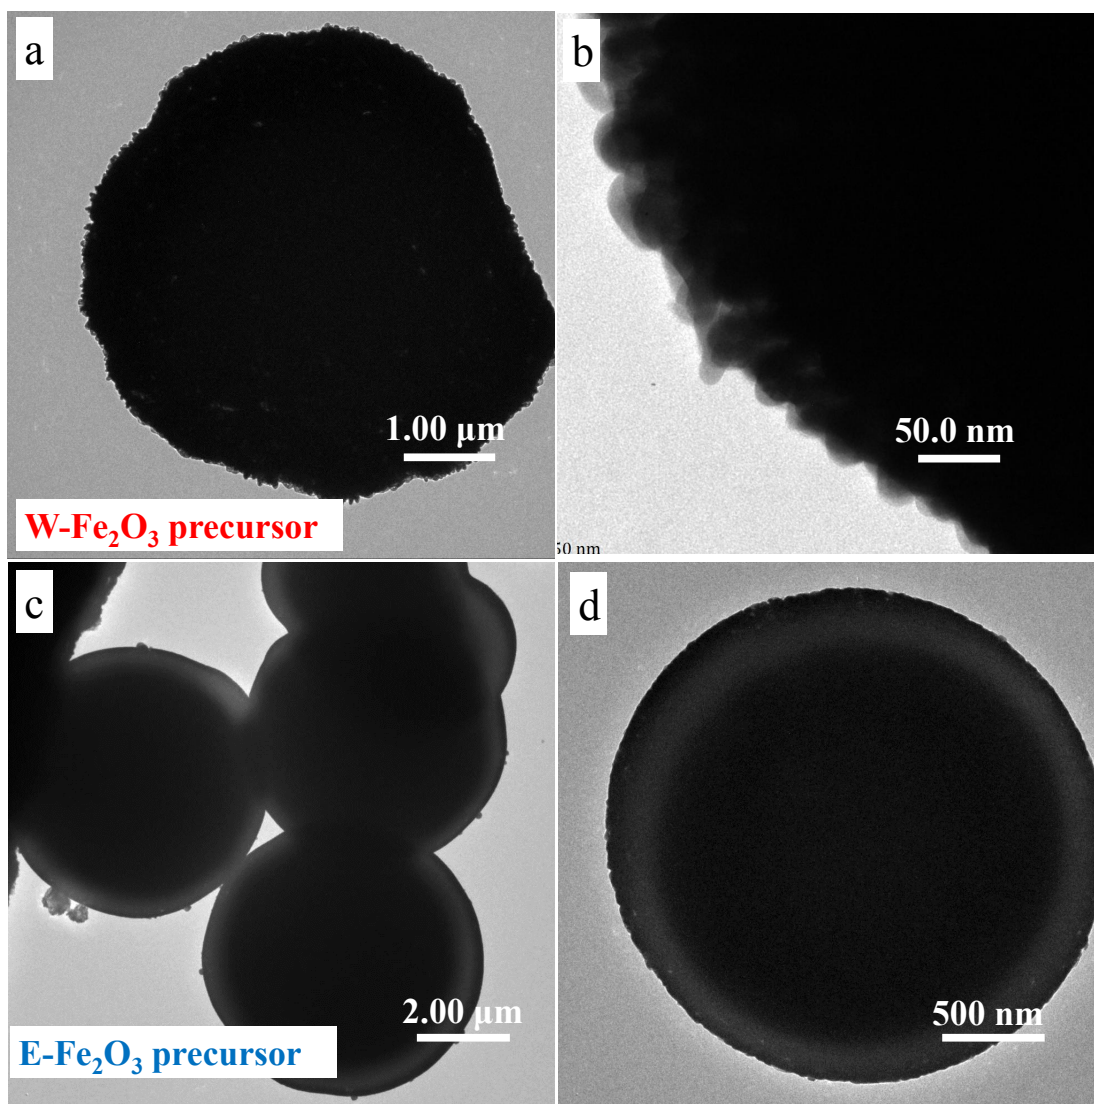

Figure S2. TEM images of W-Fe<sub>2</sub>O<sub>3</sub> precursor (a, b) and E-Fe<sub>2</sub>O<sub>3</sub> precursor (c, d).

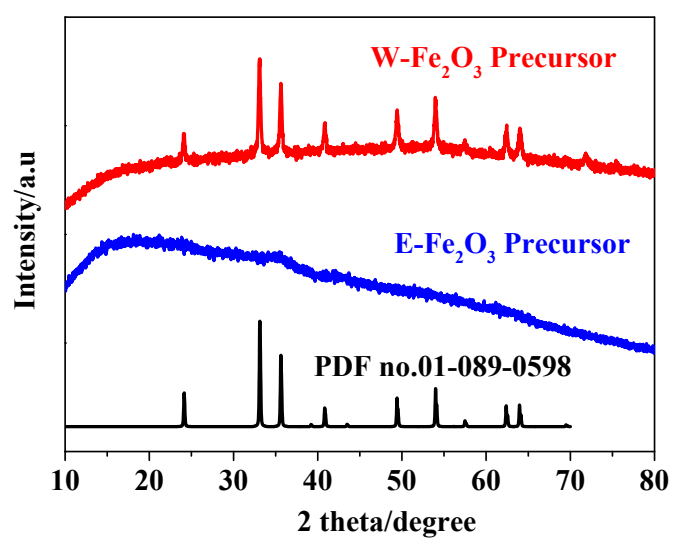

Figure S3. XRD patterns of W-Fe<sub>2</sub>O<sub>3</sub> and E-Fe<sub>2</sub>O<sub>3</sub> precursors

Table S1. C, H, N elements analysis of W-Fe<sub>2</sub>O<sub>3</sub> and E-Fe<sub>2</sub>O<sub>3</sub> precursors

|                  | <b>W-Fe<sub>2</sub>O<sub>3</sub> precursor</b> | <b>E-Fe<sub>2</sub>O<sub>3</sub> precursor</b> |
|------------------|------------------------------------------------|------------------------------------------------|
| C content (wt %) | 10.01                                          | 36.55                                          |
| N content (wt %) | 2.53                                           | 12.63                                          |
| H content (wt %) | 0.87                                           | 2.47                                           |
